# Supplementary material
Source: PubMed Central journal article supplement (PMC2533789)
Supplement: supp_M803350200_Suppfig1.pdf [file supp_M803350200_Suppfig1.pdf]

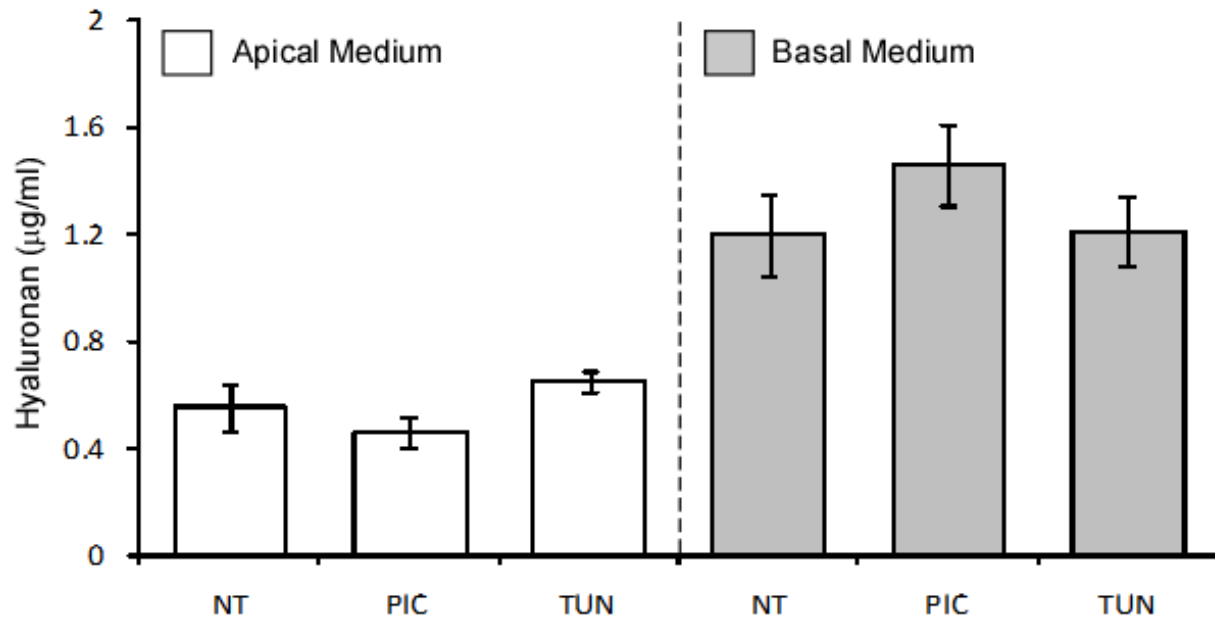

Hyaluronan secreted into the medium from the basal and apical surfaces of the AECs was analyzed by fluorophore assisted carbohydrate electrophoresis (FACE) (1). These values represent the entire amount secreted by the AECs in a 6-well plate format over an 18 hour period. No significant differences were observed between the treatment groups, although there was significantly ( $p < 0.003$ ) more hyaluronan in the basal than in the apical medium. Error bars represent standard deviation ( $n = 4$ ).

1. Calabro, A., Benavides, M., Tammi, M., Hascall, V.C., Midura, R.J. (2000) *Glycobiology* **10**, 273-281.
